# Supplementary material for: siRNA-mediated Allele-specific Silencing of a COL6A3 Mutation in a Cellular Model of Dominant Ullrich Muscular Dystrophy
Source: PubMed Central journal article supplement — Mol Ther Nucleic Acids. 2014 Feb 11;3(2):e147–. doi: 10.1038/mtna.2013.74 (PMC3950771; doi:10.1038/mtna.2013.74), 2014-02-11
Supplement: mtna201374x1.pdf [file mtna201374x1.pdf]

## Supplementary Material

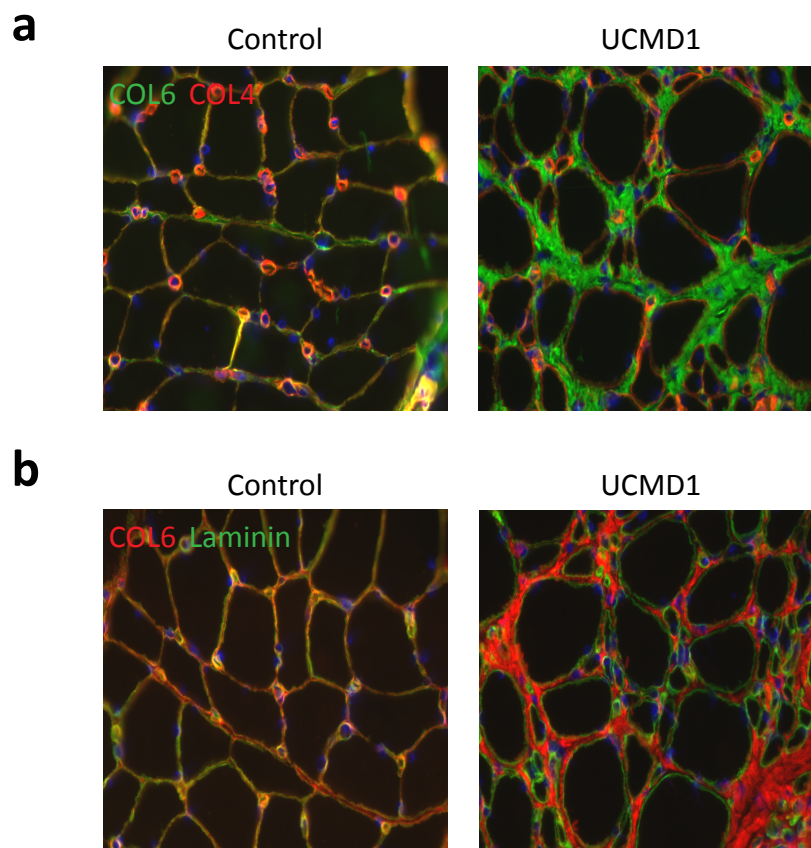

**c** Mutations of UCMD1, UCMD2, UCMD3, UCMD4

|                           | Nucleotide  | RNA        | Protein          |
|---------------------------|-------------|------------|------------------|
| UCMD1,<br>UCMD3,<br>UCMD4 | c.6210+1G>A | r.spl_ex16 | p.G2053_P2070del |
| UCMD2                     | c.6210+1G>T |            |                  |

### Supplementary Figure S1

#### Genetic and histological description of the UCMD patients used in this study.

(a) Immunofluorescence imaging of muscle biopsy from patient UCMD1, co-stained with collagen VI (green) and basement membrane marker collagen IV (red); or (b) co-stained with collagen VI (red) and basement membrane marker laminin (green). (c) List of the patients used in this study and their mutations. Patient UCMD2 presents with a different substitution at the same nucleotide position compared to the three other patients. The two different mutations cause the skipping of exon 16 of COL6A3.
