# Supplementary material for: siRNA-mediated Allele-specific Silencing of a COL6A3 Mutation in a Cellular Model of Dominant Ullrich Muscular Dystrophy
Source: PubMed Central journal article supplement — Mol Ther Nucleic Acids. 2014 Feb 11;3(2):e147–. doi: 10.1038/mtna.2013.74 (PMC3950771; doi:10.1038/mtna.2013.74), 2014-02-11
Supplement: mtna201374x3.pdf [file mtna201374x3.pdf]

**a**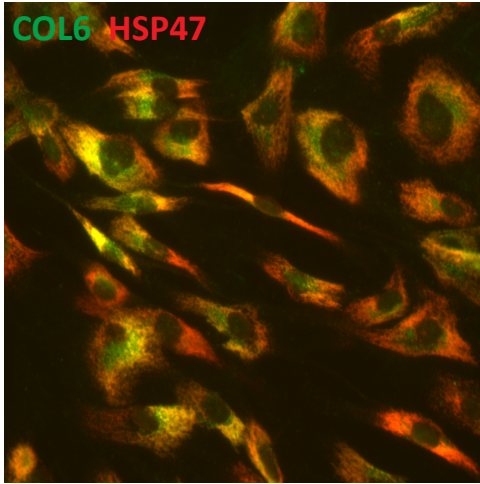**b**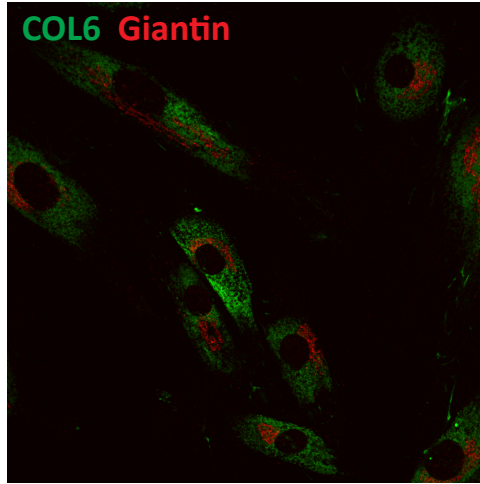**c**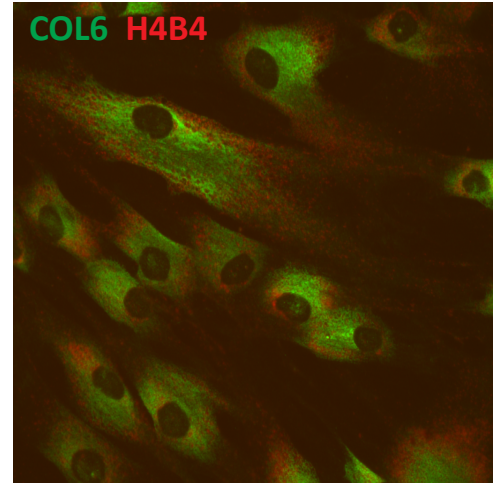

### Supplementary Figure S3

**The intracellular retained collagen VI in UCMD fibroblasts is mainly located in the endoplasmic reticulum (ER), but does not activate the unfolded protein response (UPR).**

One UCMD fibroblast culture stained with anti-collagen VI (green) shows intracellular retention, which co-localized with marker of ER HSP47 (**a**), but not with marker of Golgi giantin (**b**), or with lysosomal marker Hb4B (**c**).
